# Supplementary material for: Determinants of cerebral blood flow and arterial transit time in healthy older adults
Source: PubMed Central journal article supplement (PMC11466485; doi:10.18632/aging.206112), 2024-09-18
Supplement: aging-16-206112-s003.pdf [file aging-16-206112-s003.pdf]

## SUPPLEMENTARY TABLES

**Supplementary Table 1. Global and regional values for grey matter CBF and ATT.**

|                           | Total       | Male        | Female      |
|---------------------------|-------------|-------------|-------------|
| <b>CBF (mL/100 g/min)</b> |             |             |             |
| Global                    | 63 ± 12     | 62 ± 12     | 65 ± 12     |
| Frontal cortex            | 78 ± 17     | 78 ± 21     | 79 ± 18     |
| Parietal cortex           | 85 ± 19     | 85 ± 23     | 86 ± 19     |
| Temporal cortex           | 56 ± 12     | 55 ± 15     | 58 ± 11     |
| Occipital cortex          | 78 ± 18     | 75 ± 21     | 81 ± 18     |
| Motor cortex              | 93 ± 20     | 92 ± 25     | 95 ± 20     |
| Cingulate gyrus           | 90 ± 20     | 87 ± 23     | 92 ± 20     |
| <b>ATT (s)</b>            |             |             |             |
| Global                    | 1.42 ± 0.17 | 1.43 ± 0.17 | 1.40 ± 0.17 |
| Frontal cortex            | 1.37 ± 0.14 | 1.39 ± 0.26 | 1.35 ± 0.14 |
| Parietal cortex           | 1.50 ± 0.16 | 1.54 ± 0.30 | 1.46 ± 0.15 |
| Temporal cortex           | 1.26 ± 0.13 | 1.27 ± 0.24 | 1.26 ± 0.13 |
| Occipital cortex          | 1.59 ± 0.19 | 1.63 ± 0.32 | 1.55 ± 0.19 |
| Motor cortex              | 1.43 ± 0.14 | 1.45 ± 0.27 | 1.40 ± 0.14 |
| Cingulate gyrus           | 1.25 ± 0.18 | 1.25 ± 0.26 | 1.25 ± 0.19 |

Values represent means ± standard deviation. Global ( $n = 78$ ) and regional ( $n = 77$ ) values are from native and MNI space, respectively. Abbreviations: CBF: cerebral blood flow; ATT: arterial transit time.

**Supplementary Table 2. Associations between age, BMI, and cardiorespiratory fitness with regional CBF.**

| CBF       | Age     |          | BMI     |                  | $\dot{V}O_{2peak}$ |          |
|-----------|---------|----------|---------|------------------|--------------------|----------|
|           | $\beta$ | <i>P</i> | $\beta$ | <i>P</i>         | $\beta$            | <i>P</i> |
| Frontal   | -0.07   | 0.613    | -0.34   | <b>0.008</b>     | -0.16              | 0.346    |
| Parietal  | -0.05   | 0.722    | -0.41   | <b>0.002</b>     | -0.13              | 0.446    |
| Temporal  | -0.12   | 0.361    | -0.44   | <b>&lt;0.001</b> | -0.20              | 0.213    |
| Occipital | -0.06   | 0.639    | -0.43   | <b>&lt;0.001</b> | -0.08              | 0.597    |
| Motor     | -0.03   | 0.805    | -0.35   | <b>0.007</b>     | -0.19              | 0.257    |
| Cingulate | 0.00    | 0.987    | -0.39   | <b>0.002</b>     | -0.11              | 0.515    |

Separate multiple linear regressions were performed for each region ( $n = 77$ ), independent variables: age, sex, BMI, and  $\dot{V}O_{2peak}$ . Bold indicates significant *P*-values survived adjustment for multiple comparisons. Abbreviations:  $\beta$ : standardised beta coefficient; CBF: cerebral blood flow; BMI: body mass index;  $\dot{V}O_{2peak}$ : peak oxygen consumption.

**Supplementary Table 3. Associations between global CBF or ATT with cognitive function.**

| <i>n</i> = 76                    | gCBF (mL/100 g/min) |          | gATT (s) |          |
|----------------------------------|---------------------|----------|----------|----------|
|                                  | $\beta$             | <i>P</i> | $\beta$  | <i>P</i> |
| Age (years)                      | 0.113               | 0.400    | 0.325    | 0.015    |
| Sex                              | 0.096               | 0.435    | -0.107   | 0.372    |
| Education                        | -0.079              | 0.522    | 0.075    | 0.532    |
| <i>Processing speed</i>          |                     |          |          |          |
| Response time                    | -0.049              | 0.696    | -0.001   | 0.995    |
| Accuracy                         | 0.247               | 0.056    | -0.082   | 0.514    |
| <i>Working memory</i>            |                     |          |          |          |
| 2-back d prime                   | 0.170               | 0.190    | 0.016    | 0.900    |
| <i>Attention (response time)</i> |                     |          |          |          |
| Alerting                         | -0.122              | 0.344    | 0.041    | 0.746    |
| Orienting                        | 0.073               | 0.580    | -0.017   | 0.896    |
| Executive control                | 0.111               | 0.405    | -0.034   | 0.795    |

Results from two multiple linear regression analyses. Abbreviations:  $\beta$ : standardised beta coefficient; gCBF: global cerebral blood flow; gATT: global arterial transit time.

**Supplementary Table 4. Correlations between age and global cerebral blood flow (CBF).**

| Variables      | Co-variates | Pearson correlation | <i>P</i> |
|----------------|-------------|---------------------|----------|
| Age/Global CBF |             | $r(76) = -0.26$     | 0.82     |
| Age/Global CBF | Sex         | $r(76) = -0.32$     | 0.78     |
